# Supplementary material for: Impact of human gene annotations on RNA-seq differential expression analysis
Source: Research Square preprint supplement (doi:10.21203/rs.3.rs-301856/v1), 2021-03-08
Supplement: Supplementary file 1 [file 3192eaccb4898a8529392cb7.xlsx]

## Sheet: Contents
Additional File 4: All metrics calculated in this study
Supplementary tables
	S1	Impact of mappability on DE analysis with simulated RNA-seq data.
	S2	Impact of mappability on quantification step with simulated RNA-seq data.
	S3	Impact of mappability on alignment step with simulated RNA-seq data.
	S4	Impact of biotype on DE analysis with simulated RNA-seq data.
	S5	Impact of mappability on DE analysis with real RNA-seq data.
	S6	The number of each DEs in true and mock comparisons, with real RNA-seq data.
	S7	The performance of DE analysis (NOT tailored).
	S8	The performance of quantification step (NOT tailored).
	S9	The performance of DE analysis (tailored).
	S10	The performance of quantification step (tailored).

## Sheet: 01_sim_map_abu_de
dataset	name	bin.mappability	interval.mappability	bin.abundance	interval.abundance	n_features	n_tested	metric	value
sim_main	0.gencode-hisat2-stringtie-ballgown	Low	[0.0107,0.274)	Low	[0.252,1.33)	5014	834	spearman	0.0691406
sim_main	0.gencode-hisat2-stringtie-ballgown	Low	[0.0107,0.274)	Low	[0.252,1.33)	5014	834	nrmse	133.2
sim_main	0.gencode-hisat2-stringtie-ballgown	Low	[0.0107,0.274)	Low	[0.252,1.33)	5014	834	auc	0.517886
sim_main	0.gencode-hisat2-stringtie-ballgown	Low	[0.0107,0.274)	Middle	[1.33,5.75)	7295	3350	spearman	0.216816
sim_main	0.gencode-hisat2-stringtie-ballgown	Low	[0.0107,0.274)	Middle	[1.33,5.75)	7295	3350	nrmse	120.2
sim_main	0.gencode-hisat2-stringtie-ballgown	Low	[0.0107,0.274)	Middle	[1.33,5.75)	7295	3350	auc	0.545265
sim_main	0.gencode-hisat2-stringtie-ballgown	Low	[0.0107,0.274)	High	[5.75,54500.499]	7365	6051	spearman	0.491117
sim_main	0.gencode-hisat2-stringtie-ballgown	Low	[0.0107,0.274)	High	[5.75,54500.499]	7365	6051	nrmse	99.9
sim_main	0.gencode-hisat2-stringtie-ballgown	Low	[0.0107,0.274)	High	[5.75,54500.499]	7365	6051	auc	0.606165
sim_main	0.gencode-hisat2-stringtie-ballgown	Middle	[0.274,0.499)	Low	[0.252,1.33)	6688	740	spearman	0.123199
sim_main	0.gencode-hisat2-stringtie-ballgown	Middle	[0.274,0.499)	Low	[0.252,1.33)	6688	740	nrmse	147.4
sim_main	0.gencode-hisat2-stringtie-ballgown	Middle	[0.274,0.499)	Low	[0.252,1.33)	6688	740	auc	0.530842
sim_main	0.gencode-hisat2-stringtie-ballgown	Middle	[0.274,0.499)	Middle	[1.33,5.75)	6513	2485	spearman	0.289818
sim_main	0.gencode-hisat2-stringtie-ballgown	Middle	[0.274,0.499)	Middle	[1.33,5.75)	6513	2485	nrmse	124.3
sim_main	0.gencode-hisat2-stringtie-ballgown	Middle	[0.274,0.499)	Middle	[1.33,5.75)	6513	2485	auc	0.585338
sim_main	0.gencode-hisat2-stringtie-ballgown	Middle	[0.274,0.499)	High	[5.75,54500.499]	6473	5333	spearman	0.626818
sim_main	0.gencode-hisat2-stringtie-ballgown	Middle	[0.274,0.499)	High	[5.75,54500.499]	6473	5333	nrmse	90.5
sim_main	0.gencode-hisat2-stringtie-ballgown	Middle	[0.274,0.499)	High	[5.75,54500.499]	6473	5333	auc	0.70744
sim_main	0.gencode-hisat2-stringtie-ballgown	High	[0.499,1]	Low	[0.252,1.33)	7972	421	spearman	0.150119
sim_main	0.gencode-hisat2-stringtie-ballgown	High	[0.499,1]	Low	[0.252,1.33)	7972	421	nrmse	226.4
sim_main	0.gencode-hisat2-stringtie-ballgown	High	[0.499,1]	Low	[0.252,1.33)	7972	421	auc	0.525838
sim_main	0.gencode-hisat2-stringtie-ballgown	High	[0.499,1]	Middle	[1.33,5.75)	5866	1387	spearman	0.429493
sim_main	0.gencode-hisat2-stringtie-ballgown	High	[0.499,1]	Middle	[1.33,5.75)	5866	1387	nrmse	156.3
sim_main	0.gencode-hisat2-stringtie-ballgown	High	[0.499,1]	Middle	[1.33,5.75)	5866	1387	auc	0.59538
sim_main	0.gencode-hisat2-stringtie-ballgown	High	[0.499,1]	High	[5.75,54500.499]	5836	4373	spearman	0.845964
sim_main	0.gencode-hisat2-stringtie-ballgown	High	[0.499,1]	High	[5.75,54500.499]	5836	4373	nrmse	72.3
sim_main	0.gencode-hisat2-stringtie-ballgown	High	[0.499,1]	High	[5.75,54500.499]	5836	4373	auc	0.818839
sim_main	0.gencode-kallisto-sleuth_wt	Low	[0.0107,0.274)	Low	[0.252,1.33)	5014	3807	spearman	0.440863
sim_main	0.gencode-kallisto-sleuth_wt	Low	[0.0107,0.274)	Low	[0.252,1.33)	5014	3807	nrmse	98.9
sim_main	0.gencode-kallisto-sleuth_wt	Low	[0.0107,0.274)	Low	[0.252,1.33)	5014	3807	auc	0.598198
sim_main	0.gencode-kallisto-sleuth_wt	Low	[0.0107,0.274)	Middle	[1.33,5.75)	7295	6673	spearman	0.658019
sim_main	0.gencode-kallisto-sleuth_wt	Low	[0.0107,0.274)	Middle	[1.33,5.75)	7295	6673	nrmse	81.8
sim_main	0.gencode-kallisto-sleuth_wt	Low	[0.0107,0.274)	Middle	[1.33,5.75)	7295	6673	auc	0.685601
sim_main	0.gencode-kallisto-sleuth_wt	Low	[0.0107,0.274)	High	[5.75,54500.499]	7365	7280	spearman	0.888132
sim_main	0.gencode-kallisto-sleuth_wt	Low	[0.0107,0.274)	High	[5.75,54500.499]	7365	7280	nrmse	57.5
sim_main	0.gencode-kallisto-sleuth_wt	Low	[0.0107,0.274)	High	[5.75,54500.499]	7365	7280	auc	0.831732
sim_main	0.gencode-kallisto-sleuth_wt	Middle	[0.274,0.499)	Low	[0.252,1.33)	6688	5544	spearman	0.539138
sim_main	0.gencode-kallisto-sleuth_wt	Middle	[0.274,0.499)	Low	[0.252,1.33)	6688	5544	nrmse	90.5
sim_main	0.gencode-kallisto-sleuth_wt	Middle	[0.274,0.499)	Low	[0.252,1.33)	6688	5544	auc	0.638374
sim_main	0.gencode-kallisto-sleuth_wt	Middle	[0.274,0.499)	Middle	[1.33,5.75)	6513	6313	spearman	0.772583
sim_main	0.gencode-kallisto-sleuth_wt	Middle	[0.274,0.499)	Middle	[1.33,5.75)	6513	6313	nrmse	72.1
sim_main	0.gencode-kallisto-sleuth_wt	Middle	[0.274,0.499)	Middle	[1.33,5.75)	6513	6313	auc	0.760419
sim_main	0.gencode-kallisto-sleuth_wt	Middle	[0.274,0.499)	High	[5.75,54500.499]	6473	6444	spearman	0.920844
sim_main	0.gencode-kallisto-sleuth_wt	Middle	[0.274,0.499)	High	[5.75,54500.499]	6473	6444	nrmse	52.9
sim_main	0.gencode-kallisto-sleuth_wt	Middle	[0.274,0.499)	High	[5.75,54500.499]	6473	6444	auc	0.846472
sim_main	0.gencode-kallisto-sleuth_wt	High	[0.499,1]	Low	[0.252,1.33)	7972	7567	spearman	0.742525
sim_main	0.gencode-kallisto-sleuth_wt	High	[0.499,1]	Low	[0.252,1.33)	7972	7567	nrmse	75.7
sim_main	0.gencode-kallisto-sleuth_wt	High	[0.499,1]	Low	[0.252,1.33)	7972	7567	auc	0.721545
sim_main	0.gencode-kallisto-sleuth_wt	High	[0.499,1]	Middle	[1.33,5.75)	5866	5852	spearman	0.92759
sim_main	0.gencode-kallisto-sleuth_wt	High	[0.499,1]	Middle	[1.33,5.75)	5866	5852	nrmse	54.6
sim_main	0.gencode-kallisto-sleuth_wt	High	[0.499,1]	Middle	[1.33,5.75)	5866	5852	auc	0.823731
sim_main	0.gencode-kallisto-sleuth_wt	High	[0.499,1]	High	[5.75,54500.499]	5836	5834	spearman	0.98846
sim_main	0.gencode-kallisto-sleuth_wt	High	[0.499,1]	High	[5.75,54500.499]	5836	5834	nrmse	45.2
sim_main	0.gencode-kallisto-sleuth_wt	High	[0.499,1]	High	[5.75,54500.499]	5836	5834	auc	0.866236
sim_main	0.gencode-star-rsem-ebseq	Low	[0.0107,0.274)	Low	[0.252,1.33)	5014	4953	spearman	0.542942
sim_main	0.gencode-star-rsem-ebseq	Low	[0.0107,0.274)	Low	[0.252,1.33)	5014	4953	nrmse	85.1
sim_main	0.gencode-star-rsem-ebseq	Low	[0.0107,0.274)	Low	[0.252,1.33)	5014	4953	auc	0.632641
sim_main	0.gencode-star-rsem-ebseq	Low	[0.0107,0.274)	Middle	[1.33,5.75)	7295	7246	spearman	0.747355
sim_main	0.gencode-star-rsem-ebseq	Low	[0.0107,0.274)	Middle	[1.33,5.75)	7295	7246	nrmse	68.8
sim_main	0.gencode-star-rsem-ebseq	Low	[0.0107,0.274)	Middle	[1.33,5.75)	7295	7246	auc	0.730668
sim_main	0.gencode-star-rsem-ebseq	Low	[0.0107,0.274)	High	[5.75,54500.499]	7365	7342	spearman	0.912988
sim_main	0.gencode-star-rsem-ebseq	Low	[0.0107,0.274)	High	[5.75,54500.499]	7365	7342	nrmse	45.3
sim_main	0.gencode-star-rsem-ebseq	Low	[0.0107,0.274)	High	[5.75,54500.499]	7365	7342	auc	0.87277
sim_main	0.gencode-star-rsem-ebseq	Middle	[0.274,0.499)	Low	[0.252,1.33)	6688	6667	spearman	0.623171
sim_main	0.gencode-star-rsem-ebseq	Middle	[0.274,0.499)	Low	[0.252,1.33)	6688	6667	nrmse	79.3
sim_main	0.gencode-star-rsem-ebseq	Middle	[0.274,0.499)	Low	[0.252,1.33)	6688	6667	auc	0.677624
sim_main	0.gencode-star-rsem-ebseq	Middle	[0.274,0.499)	Middle	[1.33,5.75)	6513	6494	spearman	0.830812
sim_main	0.gencode-star-rsem-ebseq	Middle	[0.274,0.499)	Middle	[1.33,5.75)	6513	6494	nrmse	58
sim_main	0.gencode-star-rsem-ebseq	Middle	[0.274,0.499)	Middle	[1.33,5.75)	6513	6494	auc	0.792485
sim_main	0.gencode-star-rsem-ebseq	Middle	[0.274,0.499)	High	[5.75,54500.499]	6473	6472	spearman	0.946474
sim_main	0.gencode-star-rsem-ebseq	Middle	[0.274,0.499)	High	[5.75,54500.499]	6473	6472	nrmse	33.2
sim_main	0.gencode-star-rsem-ebseq	Middle	[0.274,0.499)	High	[5.75,54500.499]	6473	6472	auc	0.894959
sim_main	0.gencode-star-rsem-ebseq	High	[0.499,1]	Low	[0.252,1.33)	7972	7972	spearman	0.777546
sim_main	0.gencode-star-rsem-ebseq	High	[0.499,1]	Low	[0.252,1.33)	7972	7972	nrmse	62.4
sim_main	0.gencode-star-rsem-ebseq	High	[0.499,1]	Low	[0.252,1.33)	7972	7972	auc	0.776456
sim_main	0.gencode-star-rsem-ebseq	High	[0.499,1]	Middle	[1.33,5.75)	5866	5865	spearman	0.939341
sim_main	0.gencode-star-rsem-ebseq	High	[0.499,1]	Middle	[1.33,5.75)	5866	5865	nrmse	34.3
sim_main	0.gencode-star-rsem-ebseq	High	[0.499,1]	Middle	[1.33,5.75)	5866	5865	auc	0.876116
sim_main	0.gencode-star-rsem-ebseq	High	[0.499,1]	High	[5.75,54500.499]	5836	5836	spearman	0.988617
sim_main	0.gencode-star-rsem-ebseq	High	[0.499,1]	High	[5.75,54500.499]	5836	5836	nrmse	13.4
sim_main	0.gencode-star-rsem-ebseq	High	[0.499,1]	High	[5.75,54500.499]	5836	5836	auc	0.943383
sim_main	0.gencode-tophat2-cuffdiff	Low	[0.0107,0.274)	Low	[0.252,1.33)	5014	3732	spearman	0.513871
sim_main	0.gencode-tophat2-cuffdiff	Low	[0.0107,0.274)	Low	[0.252,1.33)	5014	3732	nrmse	95.9
sim_main	0.gencode-tophat2-cuffdiff	Low	[0.0107,0.274)	Low	[0.252,1.33)	5014	3732	auc	0.615161
sim_main	0.gencode-tophat2-cuffdiff	Low	[0.0107,0.274)	Middle	[1.33,5.75)	7295	6445	spearman	0.731641
sim_main	0.gencode-tophat2-cuffdiff	Low	[0.0107,0.274)	Middle	[1.33,5.75)	7295	6445	nrmse	87.8
sim_main	0.gencode-tophat2-cuffdiff	Low	[0.0107,0.274)	Middle	[1.33,5.75)	7295	6445	auc	0.710853
sim_main	0.gencode-tophat2-cuffdiff	Low	[0.0107,0.274)	High	[5.75,54500.499]	7365	7164	spearman	0.913049
sim_main	0.gencode-tophat2-cuffdiff	Low	[0.0107,0.274)	High	[5.75,54500.499]	7365	7164	nrmse	64.8
sim_main	0.gencode-tophat2-cuffdiff	Low	[0.0107,0.274)	High	[5.75,54500.499]	7365	7164	auc	0.860214
sim_main	0.gencode-tophat2-cuffdiff	Middle	[0.274,0.499)	Low	[0.252,1.33)	6688	5254	spearman	0.574374
sim_main	0.gencode-tophat2-cuffdiff	Middle	[0.274,0.499)	Low	[0.252,1.33)	6688	5254	nrmse	94.5
sim_main	0.gencode-tophat2-cuffdiff	Middle	[0.274,0.499)	Low	[0.252,1.33)	6688	5254	auc	0.656499
sim_main	0.gencode-tophat2-cuffdiff	Middle	[0.274,0.499)	Middle	[1.33,5.75)	6513	6005	spearman	0.817411
sim_main	0.gencode-tophat2-cuffdiff	Middle	[0.274,0.499)	Middle	[1.33,5.75)	6513	6005	nrmse	79.1
sim_main	0.gencode-tophat2-cuffdiff	Middle	[0.274,0.499)	Middle	[1.33,5.75)	6513	6005	auc	0.78048
sim_main	0.gencode-tophat2-cuffdiff	Middle	[0.274,0.499)	High	[5.75,54500.499]	6473	6416	spearman	0.94304
sim_main	0.gencode-tophat2-cuffdiff	Middle	[0.274,0.499)	High	[5.75,54500.499]	6473	6416	nrmse	52.5
sim_main	0.gencode-tophat2-cuffdiff	Middle	[0.274,0.499)	High	[5.75,54500.499]	6473	6416	auc	0.901125
sim_main	0.gencode-tophat2-cuffdiff	High	[0.499,1]	Low	[0.252,1.33)	7972	6421	spearman	0.695873
sim_main	0.gencode-tophat2-cuffdiff	High	[0.499,1]	Low	[0.252,1.33)	7972	6421	nrmse	82.7
sim_main	0.gencode-tophat2-cuffdiff	High	[0.499,1]	Low	[0.252,1.33)	7972	6421	auc	0.72795
sim_main	0.gencode-tophat2-cuffdiff	High	[0.499,1]	Middle	[1.33,5.75)	5866	5547	spearman	0.91324
sim_main	0.gencode-tophat2-cuffdiff	High	[0.499,1]	Middle	[1.33,5.75)	5866	5547	nrmse	53.6
sim_main	0.gencode-tophat2-cuffdiff	High	[0.499,1]	Middle	[1.33,5.75)	5866	5547	auc	0.854573
sim_main	0.gencode-tophat2-cuffdiff	High	[0.499,1]	High	[5.75,54500.499]	5836	5812	spearman	0.984906
sim_main	0.gencode-tophat2-cuffdiff	High	[0.499,1]	High	[5.75,54500.499]	5836	5812	nrmse	15.8
sim_main	0.gencode-tophat2-cuffdiff	High	[0.499,1]	High	[5.75,54500.499]	5836	5812	auc	0.946139

## Sheet: 02_sim_map_abu_quant
dataset	name	bin.mappability	interval.mappability	bin.abundance	interval.abundance	n_features1	n_features2	metric	value
sim_main	0.gencode-hisat2-stringtie	Low	[0.0107,0.274)	Low	[0.25,1.1)	5074	5604	spearman	0.273826
sim_main	0.gencode-hisat2-stringtie	Low	[0.0107,0.274)	Low	[0.25,1.1)	5074	5604	nrmse	100.1
sim_main	0.gencode-hisat2-stringtie	Low	[0.0107,0.274)	Middle	[1.1,5.01)	7040	7012	spearman	0.362521
sim_main	0.gencode-hisat2-stringtie	Low	[0.0107,0.274)	Middle	[1.1,5.01)	7040	7012	nrmse	99.9
sim_main	0.gencode-hisat2-stringtie	Low	[0.0107,0.274)	High	[5.01,69146.004]	7560	7058	spearman	0.665104
sim_main	0.gencode-hisat2-stringtie	Low	[0.0107,0.274)	High	[5.01,69146.004]	7560	7058	nrmse	9
sim_main	0.gencode-hisat2-stringtie	Middle	[0.274,0.499)	Low	[0.25,1.1)	6235	7063	spearman	0.388315
sim_main	0.gencode-hisat2-stringtie	Middle	[0.274,0.499)	Low	[0.25,1.1)	6235	7063	nrmse	99.1
sim_main	0.gencode-hisat2-stringtie	Middle	[0.274,0.499)	Middle	[1.1,5.01)	6714	6337	spearman	0.4701
sim_main	0.gencode-hisat2-stringtie	Middle	[0.274,0.499)	Middle	[1.1,5.01)	6714	6337	nrmse	98.9
sim_main	0.gencode-hisat2-stringtie	Middle	[0.274,0.499)	High	[5.01,69146.004]	6725	6274	spearman	0.811526
sim_main	0.gencode-hisat2-stringtie	Middle	[0.274,0.499)	High	[5.01,69146.004]	6725	6274	nrmse	52
sim_main	0.gencode-hisat2-stringtie	High	[0.499,1]	Low	[0.25,1.1)	7358	8014	spearman	0.626923
sim_main	0.gencode-hisat2-stringtie	High	[0.499,1]	Low	[0.25,1.1)	7358	8014	nrmse	93.3
sim_main	0.gencode-hisat2-stringtie	High	[0.499,1]	Middle	[1.1,5.01)	6399	5846	spearman	0.735775
sim_main	0.gencode-hisat2-stringtie	High	[0.499,1]	Middle	[1.1,5.01)	6399	5846	nrmse	90.3
sim_main	0.gencode-hisat2-stringtie	High	[0.499,1]	High	[5.01,69146.004]	5917	5814	spearman	0.953575
sim_main	0.gencode-hisat2-stringtie	High	[0.499,1]	High	[5.01,69146.004]	5917	5814	nrmse	16.6
sim_main	0.gencode-kallisto	Low	[0.0107,0.274)	Low	[0.25,1.1)	5074	5604	spearman	0.457121
sim_main	0.gencode-kallisto	Low	[0.0107,0.274)	Low	[0.25,1.1)	5074	5604	nrmse	91.2
sim_main	0.gencode-kallisto	Low	[0.0107,0.274)	Middle	[1.1,5.01)	7040	7012	spearman	0.567121
sim_main	0.gencode-kallisto	Low	[0.0107,0.274)	Middle	[1.1,5.01)	7040	7012	nrmse	85.7
sim_main	0.gencode-kallisto	Low	[0.0107,0.274)	High	[5.01,69146.004]	7560	7058	spearman	0.901381
sim_main	0.gencode-kallisto	Low	[0.0107,0.274)	High	[5.01,69146.004]	7560	7058	nrmse	23.9
sim_main	0.gencode-kallisto	Middle	[0.274,0.499)	Low	[0.25,1.1)	6235	7063	spearman	0.572432
sim_main	0.gencode-kallisto	Middle	[0.274,0.499)	Low	[0.25,1.1)	6235	7063	nrmse	85.8
sim_main	0.gencode-kallisto	Middle	[0.274,0.499)	Middle	[1.1,5.01)	6714	6337	spearman	0.697273
sim_main	0.gencode-kallisto	Middle	[0.274,0.499)	Middle	[1.1,5.01)	6714	6337	nrmse	75.3
sim_main	0.gencode-kallisto	Middle	[0.274,0.499)	High	[5.01,69146.004]	6725	6274	spearman	0.941205
sim_main	0.gencode-kallisto	Middle	[0.274,0.499)	High	[5.01,69146.004]	6725	6274	nrmse	23.6
sim_main	0.gencode-kallisto	High	[0.499,1]	Low	[0.25,1.1)	7358	8014	spearman	0.761862
sim_main	0.gencode-kallisto	High	[0.499,1]	Low	[0.25,1.1)	7358	8014	nrmse	70.8
sim_main	0.gencode-kallisto	High	[0.499,1]	Middle	[1.1,5.01)	6399	5846	spearman	0.871184
sim_main	0.gencode-kallisto	High	[0.499,1]	Middle	[1.1,5.01)	6399	5846	nrmse	51.1
sim_main	0.gencode-kallisto	High	[0.499,1]	High	[5.01,69146.004]	5917	5814	spearman	0.988232
sim_main	0.gencode-kallisto	High	[0.499,1]	High	[5.01,69146.004]	5917	5814	nrmse	18.1
sim_main	0.gencode-star-rsem	Low	[0.0107,0.274)	Low	[0.25,1.1)	5074	5604	spearman	0.407306
sim_main	0.gencode-star-rsem	Low	[0.0107,0.274)	Low	[0.25,1.1)	5074	5604	nrmse	96.4
sim_main	0.gencode-star-rsem	Low	[0.0107,0.274)	Middle	[1.1,5.01)	7040	7012	spearman	0.498656
sim_main	0.gencode-star-rsem	Low	[0.0107,0.274)	Middle	[1.1,5.01)	7040	7012	nrmse	95
sim_main	0.gencode-star-rsem	Low	[0.0107,0.274)	High	[5.01,69146.004]	7560	7058	spearman	0.859226
sim_main	0.gencode-star-rsem	Low	[0.0107,0.274)	High	[5.01,69146.004]	7560	7058	nrmse	5.9
sim_main	0.gencode-star-rsem	Middle	[0.274,0.499)	Low	[0.25,1.1)	6235	7063	spearman	0.533204
sim_main	0.gencode-star-rsem	Middle	[0.274,0.499)	Low	[0.25,1.1)	6235	7063	nrmse	95.7
sim_main	0.gencode-star-rsem	Middle	[0.274,0.499)	Middle	[1.1,5.01)	6714	6337	spearman	0.63843
sim_main	0.gencode-star-rsem	Middle	[0.274,0.499)	Middle	[1.1,5.01)	6714	6337	nrmse	87.4
sim_main	0.gencode-star-rsem	Middle	[0.274,0.499)	High	[5.01,69146.004]	6725	6274	spearman	0.909226
sim_main	0.gencode-star-rsem	Middle	[0.274,0.499)	High	[5.01,69146.004]	6725	6274	nrmse	26.8
sim_main	0.gencode-star-rsem	High	[0.499,1]	Low	[0.25,1.1)	7358	8014	spearman	0.752441
sim_main	0.gencode-star-rsem	High	[0.499,1]	Low	[0.25,1.1)	7358	8014	nrmse	75.3
sim_main	0.gencode-star-rsem	High	[0.499,1]	Middle	[1.1,5.01)	6399	5846	spearman	0.85277
sim_main	0.gencode-star-rsem	High	[0.499,1]	Middle	[1.1,5.01)	6399	5846	nrmse	60.1
sim_main	0.gencode-star-rsem	High	[0.499,1]	High	[5.01,69146.004]	5917	5814	spearman	0.981429
sim_main	0.gencode-star-rsem	High	[0.499,1]	High	[5.01,69146.004]	5917	5814	nrmse	14.1
sim_main	0.gencode-tophat2-cuffdiff	Low	[0.0107,0.274)	Low	[0.25,1.1)	5074	5604	spearman	0.424122
sim_main	0.gencode-tophat2-cuffdiff	Low	[0.0107,0.274)	Low	[0.25,1.1)	5074	5604	nrmse	95.8
sim_main	0.gencode-tophat2-cuffdiff	Low	[0.0107,0.274)	Middle	[1.1,5.01)	7040	7012	spearman	0.532725
sim_main	0.gencode-tophat2-cuffdiff	Low	[0.0107,0.274)	Middle	[1.1,5.01)	7040	7012	nrmse	92.2
sim_main	0.gencode-tophat2-cuffdiff	Low	[0.0107,0.274)	High	[5.01,69146.004]	7560	7058	spearman	0.862678
sim_main	0.gencode-tophat2-cuffdiff	Low	[0.0107,0.274)	High	[5.01,69146.004]	7560	7058	nrmse	6.6
sim_main	0.gencode-tophat2-cuffdiff	Middle	[0.274,0.499)	Low	[0.25,1.1)	6235	7063	spearman	0.546312
sim_main	0.gencode-tophat2-cuffdiff	Middle	[0.274,0.499)	Low	[0.25,1.1)	6235	7063	nrmse	93.3
sim_main	0.gencode-tophat2-cuffdiff	Middle	[0.274,0.499)	Middle	[1.1,5.01)	6714	6337	spearman	0.662134
sim_main	0.gencode-tophat2-cuffdiff	Middle	[0.274,0.499)	Middle	[1.1,5.01)	6714	6337	nrmse	94.2
sim_main	0.gencode-tophat2-cuffdiff	Middle	[0.274,0.499)	High	[5.01,69146.004]	6725	6274	spearman	0.919021
sim_main	0.gencode-tophat2-cuffdiff	Middle	[0.274,0.499)	High	[5.01,69146.004]	6725	6274	nrmse	26.1
sim_main	0.gencode-tophat2-cuffdiff	High	[0.499,1]	Low	[0.25,1.1)	7358	8014	spearman	0.725662
sim_main	0.gencode-tophat2-cuffdiff	High	[0.499,1]	Low	[0.25,1.1)	7358	8014	nrmse	99.1
sim_main	0.gencode-tophat2-cuffdiff	High	[0.499,1]	Middle	[1.1,5.01)	6399	5846	spearman	0.8289
sim_main	0.gencode-tophat2-cuffdiff	High	[0.499,1]	Middle	[1.1,5.01)	6399	5846	nrmse	87.8
sim_main	0.gencode-tophat2-cuffdiff	High	[0.499,1]	High	[5.01,69146.004]	5917	5814	spearman	0.975836
sim_main	0.gencode-tophat2-cuffdiff	High	[0.499,1]	High	[5.01,69146.004]	5917	5814	nrmse	14.8

## Sheet: 03_sim_map_align
dataset	name	bin	interval	n_features	source_id	metric	value
sim_main	0.gencode-hisat2	Low	[0.0107,0.274)	19674	1	recall	0.989227
sim_main	0.gencode-hisat2	Low	[0.0107,0.274)	19674	1	precision	0.977704
sim_main	0.gencode-hisat2	Low	[0.0107,0.274)	19674	1	f1	0.983432
sim_main	0.gencode-hisat2	Low	[0.0107,0.274)	19674	2	recall	0.989262
sim_main	0.gencode-hisat2	Low	[0.0107,0.274)	19674	2	precision	0.977674
sim_main	0.gencode-hisat2	Low	[0.0107,0.274)	19674	2	f1	0.983434
sim_main	0.gencode-hisat2	Low	[0.0107,0.274)	19674	3	recall	0.988754
sim_main	0.gencode-hisat2	Low	[0.0107,0.274)	19674	3	precision	0.978551
sim_main	0.gencode-hisat2	Low	[0.0107,0.274)	19674	3	f1	0.983626
sim_main	0.gencode-hisat2	Low	[0.0107,0.274)	19674	5	recall	0.989153
sim_main	0.gencode-hisat2	Low	[0.0107,0.274)	19674	5	precision	0.974336
sim_main	0.gencode-hisat2	Low	[0.0107,0.274)	19674	5	f1	0.981688
sim_main	0.gencode-hisat2	Low	[0.0107,0.274)	19674	6	recall	0.988975
sim_main	0.gencode-hisat2	Low	[0.0107,0.274)	19674	6	precision	0.971331
sim_main	0.gencode-hisat2	Low	[0.0107,0.274)	19674	6	f1	0.980073
sim_main	0.gencode-hisat2	Middle	[0.274,0.499)	19674	1	recall	0.992386
sim_main	0.gencode-hisat2	Middle	[0.274,0.499)	19674	1	precision	0.994773
sim_main	0.gencode-hisat2	Middle	[0.274,0.499)	19674	1	f1	0.993578
sim_main	0.gencode-hisat2	Middle	[0.274,0.499)	19674	2	recall	0.992458
sim_main	0.gencode-hisat2	Middle	[0.274,0.499)	19674	2	precision	0.994883
sim_main	0.gencode-hisat2	Middle	[0.274,0.499)	19674	2	f1	0.993669
sim_main	0.gencode-hisat2	Middle	[0.274,0.499)	19674	3	recall	0.992512
sim_main	0.gencode-hisat2	Middle	[0.274,0.499)	19674	3	precision	0.995103
sim_main	0.gencode-hisat2	Middle	[0.274,0.499)	19674	3	f1	0.993806
sim_main	0.gencode-hisat2	Middle	[0.274,0.499)	19674	5	recall	0.992121
sim_main	0.gencode-hisat2	Middle	[0.274,0.499)	19674	5	precision	0.993677
sim_main	0.gencode-hisat2	Middle	[0.274,0.499)	19674	5	f1	0.992899
sim_main	0.gencode-hisat2	Middle	[0.274,0.499)	19674	6	recall	0.992294
sim_main	0.gencode-hisat2	Middle	[0.274,0.499)	19674	6	precision	0.993746
sim_main	0.gencode-hisat2	Middle	[0.274,0.499)	19674	6	f1	0.993019
sim_main	0.gencode-hisat2	High	[0.499,1]	19674	1	recall	0.992773
sim_main	0.gencode-hisat2	High	[0.499,1]	19674	1	precision	0.997975
sim_main	0.gencode-hisat2	High	[0.499,1]	19674	1	f1	0.995368
sim_main	0.gencode-hisat2	High	[0.499,1]	19674	2	recall	0.99278
sim_main	0.gencode-hisat2	High	[0.499,1]	19674	2	precision	0.998081
sim_main	0.gencode-hisat2	High	[0.499,1]	19674	2	f1	0.995423
sim_main	0.gencode-hisat2	High	[0.499,1]	19674	3	recall	0.992704
sim_main	0.gencode-hisat2	High	[0.499,1]	19674	3	precision	0.998054
sim_main	0.gencode-hisat2	High	[0.499,1]	19674	3	f1	0.995372
sim_main	0.gencode-hisat2	High	[0.499,1]	19674	5	recall	0.992713
sim_main	0.gencode-hisat2	High	[0.499,1]	19674	5	precision	0.997772
sim_main	0.gencode-hisat2	High	[0.499,1]	19674	5	f1	0.995236
sim_main	0.gencode-hisat2	High	[0.499,1]	19674	6	recall	0.992586
sim_main	0.gencode-hisat2	High	[0.499,1]	19674	6	precision	0.997661
sim_main	0.gencode-hisat2	High	[0.499,1]	19674	6	f1	0.995117
sim_main	0.gencode-star	Low	[0.0107,0.274)	19674	1	recall	0.999638
sim_main	0.gencode-star	Low	[0.0107,0.274)	19674	1	precision	0.976895
sim_main	0.gencode-star	Low	[0.0107,0.274)	19674	1	f1	0.988136
sim_main	0.gencode-star	Low	[0.0107,0.274)	19674	2	recall	0.999613
sim_main	0.gencode-star	Low	[0.0107,0.274)	19674	2	precision	0.977993
sim_main	0.gencode-star	Low	[0.0107,0.274)	19674	2	f1	0.988685
sim_main	0.gencode-star	Low	[0.0107,0.274)	19674	3	recall	0.999651
sim_main	0.gencode-star	Low	[0.0107,0.274)	19674	3	precision	0.977203
sim_main	0.gencode-star	Low	[0.0107,0.274)	19674	3	f1	0.9883
sim_main	0.gencode-star	Low	[0.0107,0.274)	19674	4	recall	0.999524
sim_main	0.gencode-star	Low	[0.0107,0.274)	19674	4	precision	0.973686
sim_main	0.gencode-star	Low	[0.0107,0.274)	19674	4	f1	0.986436
sim_main	0.gencode-star	Low	[0.0107,0.274)	19674	5	recall	0.999597
sim_main	0.gencode-star	Low	[0.0107,0.274)	19674	5	precision	0.972789
sim_main	0.gencode-star	Low	[0.0107,0.274)	19674	5	f1	0.986011
sim_main	0.gencode-star	Low	[0.0107,0.274)	19674	6	recall	0.999584
sim_main	0.gencode-star	Low	[0.0107,0.274)	19674	6	precision	0.972207
sim_main	0.gencode-star	Low	[0.0107,0.274)	19674	6	f1	0.985705
sim_main	0.gencode-star	Middle	[0.274,0.499)	19674	1	recall	0.999873
sim_main	0.gencode-star	Middle	[0.274,0.499)	19674	1	precision	0.994402
sim_main	0.gencode-star	Middle	[0.274,0.499)	19674	1	f1	0.99713
sim_main	0.gencode-star	Middle	[0.274,0.499)	19674	2	recall	0.999867
sim_main	0.gencode-star	Middle	[0.274,0.499)	19674	2	precision	0.994523
sim_main	0.gencode-star	Middle	[0.274,0.499)	19674	2	f1	0.997188
sim_main	0.gencode-star	Middle	[0.274,0.499)	19674	3	recall	0.999886
sim_main	0.gencode-star	Middle	[0.274,0.499)	19674	3	precision	0.994762
sim_main	0.gencode-star	Middle	[0.274,0.499)	19674	3	f1	0.997317
sim_main	0.gencode-star	Middle	[0.274,0.499)	19674	4	recall	0.99975
sim_main	0.gencode-star	Middle	[0.274,0.499)	19674	4	precision	0.993376
sim_main	0.gencode-star	Middle	[0.274,0.499)	19674	4	f1	0.996553
sim_main	0.gencode-star	Middle	[0.274,0.499)	19674	5	recall	0.999819
sim_main	0.gencode-star	Middle	[0.274,0.499)	19674	5	precision	0.993037
sim_main	0.gencode-star	Middle	[0.274,0.499)	19674	5	f1	0.996416
sim_main	0.gencode-star	Middle	[0.274,0.499)	19674	6	recall	0.999796
sim_main	0.gencode-star	Middle	[0.274,0.499)	19674	6	precision	0.993073
sim_main	0.gencode-star	Middle	[0.274,0.499)	19674	6	f1	0.996423
sim_main	0.gencode-star	High	[0.499,1]	19674	1	recall	0.999811
sim_main	0.gencode-star	High	[0.499,1]	19674	1	precision	0.997844
sim_main	0.gencode-star	High	[0.499,1]	19674	1	f1	0.998826
sim_main	0.gencode-star	High	[0.499,1]	19674	2	recall	0.999822
sim_main	0.gencode-star	High	[0.499,1]	19674	2	precision	0.99793
sim_main	0.gencode-star	High	[0.499,1]	19674	2	f1	0.998875
sim_main	0.gencode-star	High	[0.499,1]	19674	3	recall	0.999814
sim_main	0.gencode-star	High	[0.499,1]	19674	3	precision	0.997915
sim_main	0.gencode-star	High	[0.499,1]	19674	3	f1	0.998864
sim_main	0.gencode-star	High	[0.499,1]	19674	4	recall	0.999816
sim_main	0.gencode-star	High	[0.499,1]	19674	4	precision	0.997447
sim_main	0.gencode-star	High	[0.499,1]	19674	4	f1	0.99863
sim_main	0.gencode-star	High	[0.499,1]	19674	5	recall	0.999844
sim_main	0.gencode-star	High	[0.499,1]	19674	5	precision	0.997482
sim_main	0.gencode-star	High	[0.499,1]	19674	5	f1	0.998661
sim_main	0.gencode-star	High	[0.499,1]	19674	6	recall	0.999831
sim_main	0.gencode-star	High	[0.499,1]	19674	6	precision	0.997353
sim_main	0.gencode-star	High	[0.499,1]	19674	6	f1	0.99859
sim_main	0.gencode-tophat2	Low	[0.0107,0.274)	19674	1	recall	0.972168
sim_main	0.gencode-tophat2	Low	[0.0107,0.274)	19674	1	precision	0.979051
sim_main	0.gencode-tophat2	Low	[0.0107,0.274)	19674	1	f1	0.975597
sim_main	0.gencode-tophat2	Low	[0.0107,0.274)	19674	2	recall	0.972198
sim_main	0.gencode-tophat2	Low	[0.0107,0.274)	19674	2	precision	0.979836
sim_main	0.gencode-tophat2	Low	[0.0107,0.274)	19674	2	f1	0.976002
sim_main	0.gencode-tophat2	Low	[0.0107,0.274)	19674	3	recall	0.972045
sim_main	0.gencode-tophat2	Low	[0.0107,0.274)	19674	3	precision	0.979752
sim_main	0.gencode-tophat2	Low	[0.0107,0.274)	19674	3	f1	0.975884
sim_main	0.gencode-tophat2	Low	[0.0107,0.274)	19674	4	recall	0.972002
sim_main	0.gencode-tophat2	Low	[0.0107,0.274)	19674	4	precision	0.978188
sim_main	0.gencode-tophat2	Low	[0.0107,0.274)	19674	4	f1	0.975085
sim_main	0.gencode-tophat2	Low	[0.0107,0.274)	19674	5	recall	0.971984
sim_main	0.gencode-tophat2	Low	[0.0107,0.274)	19674	5	precision	0.977687
sim_main	0.gencode-tophat2	Low	[0.0107,0.274)	19674	5	f1	0.974827
sim_main	0.gencode-tophat2	Low	[0.0107,0.274)	19674	6	recall	0.971961
sim_main	0.gencode-tophat2	Low	[0.0107,0.274)	19674	6	precision	0.976879
sim_main	0.gencode-tophat2	Low	[0.0107,0.274)	19674	6	f1	0.974414
sim_main	0.gencode-tophat2	Middle	[0.274,0.499)	19674	1	recall	0.972408
sim_main	0.gencode-tophat2	Middle	[0.274,0.499)	19674	1	precision	0.995959
sim_main	0.gencode-tophat2	Middle	[0.274,0.499)	19674	1	f1	0.984043
sim_main	0.gencode-tophat2	Middle	[0.274,0.499)	19674	2	recall	0.972346
sim_main	0.gencode-tophat2	Middle	[0.274,0.499)	19674	2	precision	0.996094
sim_main	0.gencode-tophat2	Middle	[0.274,0.499)	19674	2	f1	0.984077
sim_main	0.gencode-tophat2	Middle	[0.274,0.499)	19674	3	recall	0.972201
sim_main	0.gencode-tophat2	Middle	[0.274,0.499)	19674	3	precision	0.996217
sim_main	0.gencode-tophat2	Middle	[0.274,0.499)	19674	3	f1	0.984063
sim_main	0.gencode-tophat2	Middle	[0.274,0.499)	19674	4	recall	0.972362
sim_main	0.gencode-tophat2	Middle	[0.274,0.499)	19674	4	precision	0.995626
sim_main	0.gencode-tophat2	Middle	[0.274,0.499)	19674	4	f1	0.983857
sim_main	0.gencode-tophat2	Middle	[0.274,0.499)	19674	5	recall	0.972395
sim_main	0.gencode-tophat2	Middle	[0.274,0.499)	19674	5	precision	0.995211
sim_main	0.gencode-tophat2	Middle	[0.274,0.499)	19674	5	f1	0.983671
sim_main	0.gencode-tophat2	Middle	[0.274,0.499)	19674	6	recall	0.972466
sim_main	0.gencode-tophat2	Middle	[0.274,0.499)	19674	6	precision	0.995414
sim_main	0.gencode-tophat2	Middle	[0.274,0.499)	19674	6	f1	0.983806
sim_main	0.gencode-tophat2	High	[0.499,1]	19674	1	recall	0.972729
sim_main	0.gencode-tophat2	High	[0.499,1]	19674	1	precision	0.999103
sim_main	0.gencode-tophat2	High	[0.499,1]	19674	1	f1	0.98574
sim_main	0.gencode-tophat2	High	[0.499,1]	19674	2	recall	0.972551
sim_main	0.gencode-tophat2	High	[0.499,1]	19674	2	precision	0.999183
sim_main	0.gencode-tophat2	High	[0.499,1]	19674	2	f1	0.985687
sim_main	0.gencode-tophat2	High	[0.499,1]	19674	3	recall	0.972523
sim_main	0.gencode-tophat2	High	[0.499,1]	19674	3	precision	0.999159
sim_main	0.gencode-tophat2	High	[0.499,1]	19674	3	f1	0.985661
sim_main	0.gencode-tophat2	High	[0.499,1]	19674	4	recall	0.972451
sim_main	0.gencode-tophat2	High	[0.499,1]	19674	4	precision	0.999236
sim_main	0.gencode-tophat2	High	[0.499,1]	19674	4	f1	0.985661
sim_main	0.gencode-tophat2	High	[0.499,1]	19674	5	recall	0.972577
sim_main	0.gencode-tophat2	High	[0.499,1]	19674	5	precision	0.999236
sim_main	0.gencode-tophat2	High	[0.499,1]	19674	5	f1	0.985726
sim_main	0.gencode-tophat2	High	[0.499,1]	19674	6	recall	0.972638
sim_main	0.gencode-tophat2	High	[0.499,1]	19674	6	precision	0.999209
sim_main	0.gencode-tophat2	High	[0.499,1]	19674	6	f1	0.985744

## Sheet: 04_sim_biotype_de
dataset	name	biotype	n_features	n_tested	metric	value
sim_main	0.gencode-hisat2-stringtie-ballgown	all	59022	24974	spearman	0.410383
sim_main	0.gencode-hisat2-stringtie-ballgown	all	59022	24974	nrmse	110.2
sim_main	0.gencode-hisat2-stringtie-ballgown	all	59022	24974	auc	0.631357
sim_main	0.gencode-hisat2-stringtie-ballgown	lncrna	4104	702	spearman	0.313255
sim_main	0.gencode-hisat2-stringtie-ballgown	lncrna	4104	702	nrmse	155.8
sim_main	0.gencode-hisat2-stringtie-ballgown	lncrna	4104	702	auc	0.57707
sim_main	0.gencode-hisat2-stringtie-ballgown	mrna	31854	18863	spearman	0.471689
sim_main	0.gencode-hisat2-stringtie-ballgown	mrna	31854	18863	nrmse	103.6
sim_main	0.gencode-hisat2-stringtie-ballgown	mrna	31854	18863	auc	0.645936
sim_main	0.gencode-hisat2-stringtie-ballgown	others	23064	5409	spearman	0.30433
sim_main	0.gencode-hisat2-stringtie-ballgown	others	23064	5409	nrmse	127.4
sim_main	0.gencode-hisat2-stringtie-ballgown	others	23064	5409	auc	0.59259
sim_main	0.gencode-kallisto-sleuth_wt	all	59022	55314	spearman	0.78151
sim_main	0.gencode-kallisto-sleuth_wt	all	59022	55314	nrmse	68.7
sim_main	0.gencode-kallisto-sleuth_wt	all	59022	55314	auc	0.773472
sim_main	0.gencode-kallisto-sleuth_wt	lncrna	4104	3852	spearman	0.809753
sim_main	0.gencode-kallisto-sleuth_wt	lncrna	4104	3852	nrmse	68.6
sim_main	0.gencode-kallisto-sleuth_wt	lncrna	4104	3852	auc	0.781275
sim_main	0.gencode-kallisto-sleuth_wt	mrna	31854	30017	spearman	0.808058
sim_main	0.gencode-kallisto-sleuth_wt	mrna	31854	30017	nrmse	66.2
sim_main	0.gencode-kallisto-sleuth_wt	mrna	31854	30017	auc	0.788794
sim_main	0.gencode-kallisto-sleuth_wt	others	23064	21445	spearman	0.727708
sim_main	0.gencode-kallisto-sleuth_wt	others	23064	21445	nrmse	75.1
sim_main	0.gencode-kallisto-sleuth_wt	others	23064	21445	auc	0.743784
sim_main	0.gencode-star-rsem-ebseq	all	59022	58847	spearman	0.825023
sim_main	0.gencode-star-rsem-ebseq	all	59022	58847	nrmse	55
sim_main	0.gencode-star-rsem-ebseq	all	59022	58847	auc	0.82416
sim_main	0.gencode-star-rsem-ebseq	lncrna	4104	4097	spearman	0.829979
sim_main	0.gencode-star-rsem-ebseq	lncrna	4104	4097	nrmse	54.5
sim_main	0.gencode-star-rsem-ebseq	lncrna	4104	4097	auc	0.831836
sim_main	0.gencode-star-rsem-ebseq	mrna	31854	31730	spearman	0.847696
sim_main	0.gencode-star-rsem-ebseq	mrna	31854	31730	nrmse	52.8
sim_main	0.gencode-star-rsem-ebseq	mrna	31854	31730	auc	0.838645
sim_main	0.gencode-star-rsem-ebseq	others	23064	23020	spearman	0.781717
sim_main	0.gencode-star-rsem-ebseq	others	23064	23020	nrmse	61.2
sim_main	0.gencode-star-rsem-ebseq	others	23064	23020	auc	0.793463
sim_main	0.gencode-tophat2-cuffdiff	all	59022	52796	spearman	0.808206
sim_main	0.gencode-tophat2-cuffdiff	all	59022	52796	nrmse	81.8
sim_main	0.gencode-tophat2-cuffdiff	all	59022	52796	auc	0.81124
sim_main	0.gencode-tophat2-cuffdiff	lncrna	4104	3083	spearman	0.765731
sim_main	0.gencode-tophat2-cuffdiff	lncrna	4104	3083	nrmse	82.3
sim_main	0.gencode-tophat2-cuffdiff	lncrna	4104	3083	auc	0.772559
sim_main	0.gencode-tophat2-cuffdiff	mrna	31854	29067	spearman	0.844806
sim_main	0.gencode-tophat2-cuffdiff	mrna	31854	29067	nrmse	78.7
sim_main	0.gencode-tophat2-cuffdiff	mrna	31854	29067	auc	0.833871
sim_main	0.gencode-tophat2-cuffdiff	others	23064	20646	spearman	0.749155
sim_main	0.gencode-tophat2-cuffdiff	others	23064	20646	nrmse	87.6
sim_main	0.gencode-tophat2-cuffdiff	others	23064	20646	auc	0.773345

## Sheet: 05_real_map_abu_qpcr
dataset	name	bin.mappability	interval.mappability	bin.qpcr	interval.qpcr	n_features	n_tested	metric	value
real_main	00.gencode-hisat2-stringtie-ballgown	Low	[0.46,0.961)	Low	[0.000512,0.0621)	50	21	spearman	0.657477
real_main	00.gencode-hisat2-stringtie-ballgown	Low	[0.46,0.961)	Low	[0.000512,0.0621)	50	21	nrmse	131.6
real_main	00.gencode-star-rsem-ebseq	Low	[0.46,0.961)	Low	[0.000512,0.0621)	50	50	spearman	0.826074
real_main	00.gencode-star-rsem-ebseq	Low	[0.46,0.961)	Low	[0.000512,0.0621)	50	50	nrmse	55.1
real_main	00.gencode-tophat2-cuffdiff	Low	[0.46,0.961)	Low	[0.000512,0.0621)	50	42	spearman	0.80975
real_main	00.gencode-tophat2-cuffdiff	Low	[0.46,0.961)	Low	[0.000512,0.0621)	50	42	nrmse	69.8
real_main	00.gencode-hisat2-stringtie-ballgown	Low	[0.46,0.961)	Middle	[0.0621,0.353)	56	48	spearman	0.900747
real_main	00.gencode-hisat2-stringtie-ballgown	Low	[0.46,0.961)	Middle	[0.0621,0.353)	56	48	nrmse	70.5
real_main	00.gencode-star-rsem-ebseq	Low	[0.46,0.961)	Middle	[0.0621,0.353)	56	56	spearman	0.934518
real_main	00.gencode-star-rsem-ebseq	Low	[0.46,0.961)	Middle	[0.0621,0.353)	56	56	nrmse	34.2
real_main	00.gencode-tophat2-cuffdiff	Low	[0.46,0.961)	Middle	[0.0621,0.353)	56	56	spearman	0.934518
real_main	00.gencode-tophat2-cuffdiff	Low	[0.46,0.961)	Middle	[0.0621,0.353)	56	56	nrmse	33.1
real_main	00.gencode-hisat2-stringtie-ballgown	Low	[0.46,0.961)	High	[0.353,38.801]	61	60	spearman	0.891274
real_main	00.gencode-hisat2-stringtie-ballgown	Low	[0.46,0.961)	High	[0.353,38.801]	61	60	nrmse	106.5
real_main	00.gencode-star-rsem-ebseq	Low	[0.46,0.961)	High	[0.353,38.801]	61	61	spearman	0.931359
real_main	00.gencode-star-rsem-ebseq	Low	[0.46,0.961)	High	[0.353,38.801]	61	61	nrmse	26.9
real_main	00.gencode-tophat2-cuffdiff	Low	[0.46,0.961)	High	[0.353,38.801]	61	61	spearman	0.930143
real_main	00.gencode-tophat2-cuffdiff	Low	[0.46,0.961)	High	[0.353,38.801]	61	61	nrmse	32.9
real_main	00.gencode-hisat2-stringtie-ballgown	Middle	[0.961,0.991)	Low	[0.000512,0.0621)	54	30	spearman	0.868204
real_main	00.gencode-hisat2-stringtie-ballgown	Middle	[0.961,0.991)	Low	[0.000512,0.0621)	54	30	nrmse	100.8
real_main	00.gencode-star-rsem-ebseq	Middle	[0.961,0.991)	Low	[0.000512,0.0621)	54	54	spearman	0.938174
real_main	00.gencode-star-rsem-ebseq	Middle	[0.961,0.991)	Low	[0.000512,0.0621)	54	54	nrmse	33.9
real_main	00.gencode-tophat2-cuffdiff	Middle	[0.961,0.991)	Low	[0.000512,0.0621)	54	46	spearman	0.937733
real_main	00.gencode-tophat2-cuffdiff	Middle	[0.961,0.991)	Low	[0.000512,0.0621)	54	46	nrmse	36.8
real_main	00.gencode-hisat2-stringtie-ballgown	Middle	[0.961,0.991)	Middle	[0.0621,0.353)	59	53	spearman	0.867598
real_main	00.gencode-hisat2-stringtie-ballgown	Middle	[0.961,0.991)	Middle	[0.0621,0.353)	59	53	nrmse	82.5
real_main	00.gencode-star-rsem-ebseq	Middle	[0.961,0.991)	Middle	[0.0621,0.353)	59	59	spearman	0.937405
real_main	00.gencode-star-rsem-ebseq	Middle	[0.961,0.991)	Middle	[0.0621,0.353)	59	59	nrmse	32.6
real_main	00.gencode-tophat2-cuffdiff	Middle	[0.961,0.991)	Middle	[0.0621,0.353)	59	59	spearman	0.908825
real_main	00.gencode-tophat2-cuffdiff	Middle	[0.961,0.991)	Middle	[0.0621,0.353)	59	59	nrmse	40.1
real_main	00.gencode-hisat2-stringtie-ballgown	Middle	[0.961,0.991)	High	[0.353,38.801]	54	53	spearman	0.930322
real_main	00.gencode-hisat2-stringtie-ballgown	Middle	[0.961,0.991)	High	[0.353,38.801]	54	53	nrmse	73.3
real_main	00.gencode-star-rsem-ebseq	Middle	[0.961,0.991)	High	[0.353,38.801]	54	54	spearman	0.93825
real_main	00.gencode-star-rsem-ebseq	Middle	[0.961,0.991)	High	[0.353,38.801]	54	54	nrmse	25.4
real_main	00.gencode-tophat2-cuffdiff	Middle	[0.961,0.991)	High	[0.353,38.801]	54	54	spearman	0.963408
real_main	00.gencode-tophat2-cuffdiff	Middle	[0.961,0.991)	High	[0.353,38.801]	54	54	nrmse	43.8
real_main	00.gencode-hisat2-stringtie-ballgown	High	[0.991,1)	Low	[0.000512,0.0621)	40	20	spearman	0.743318
real_main	00.gencode-hisat2-stringtie-ballgown	High	[0.991,1)	Low	[0.000512,0.0621)	40	20	nrmse	166.9
real_main	00.gencode-star-rsem-ebseq	High	[0.991,1)	Low	[0.000512,0.0621)	40	40	spearman	0.9394
real_main	00.gencode-star-rsem-ebseq	High	[0.991,1)	Low	[0.000512,0.0621)	40	40	nrmse	27.7
real_main	00.gencode-tophat2-cuffdiff	High	[0.991,1)	Low	[0.000512,0.0621)	40	33	spearman	0.895225
real_main	00.gencode-tophat2-cuffdiff	High	[0.991,1)	Low	[0.000512,0.0621)	40	33	nrmse	39.7
real_main	00.gencode-hisat2-stringtie-ballgown	High	[0.991,1)	Middle	[0.0621,0.353)	58	50	spearman	0.847692
real_main	00.gencode-hisat2-stringtie-ballgown	High	[0.991,1)	Middle	[0.0621,0.353)	58	50	nrmse	61
real_main	00.gencode-star-rsem-ebseq	High	[0.991,1)	Middle	[0.0621,0.353)	58	58	spearman	0.947215
real_main	00.gencode-star-rsem-ebseq	High	[0.991,1)	Middle	[0.0621,0.353)	58	58	nrmse	28.4
real_main	00.gencode-tophat2-cuffdiff	High	[0.991,1)	Middle	[0.0621,0.353)	58	58	spearman	0.927466
real_main	00.gencode-tophat2-cuffdiff	High	[0.991,1)	Middle	[0.0621,0.353)	58	58	nrmse	35.3
real_main	00.gencode-hisat2-stringtie-ballgown	High	[0.991,1)	High	[0.353,38.801]	70	70	spearman	0.974525
real_main	00.gencode-hisat2-stringtie-ballgown	High	[0.991,1)	High	[0.353,38.801]	70	70	nrmse	87.3
real_main	00.gencode-star-rsem-ebseq	High	[0.991,1)	High	[0.353,38.801]	70	70	spearman	0.980404
real_main	00.gencode-star-rsem-ebseq	High	[0.991,1)	High	[0.353,38.801]	70	70	nrmse	18.9
real_main	00.gencode-tophat2-cuffdiff	High	[0.991,1)	High	[0.353,38.801]	70	70	spearman	0.981524
real_main	00.gencode-tophat2-cuffdiff	High	[0.991,1)	High	[0.353,38.801]	70	70	nrmse	25.9
real_main	00.gencode-hisat2-stringtie-ballgown	1	1	Low	[0.000512,0.0621)	136	76	spearman	0.795048
real_main	00.gencode-hisat2-stringtie-ballgown	1	1	Low	[0.000512,0.0621)	136	76	nrmse	141.1
real_main	00.gencode-star-rsem-ebseq	1	1	Low	[0.000512,0.0621)	136	136	spearman	0.891465
real_main	00.gencode-star-rsem-ebseq	1	1	Low	[0.000512,0.0621)	136	136	nrmse	45.9
real_main	00.gencode-tophat2-cuffdiff	1	1	Low	[0.000512,0.0621)	136	116	spearman	0.894928
real_main	00.gencode-tophat2-cuffdiff	1	1	Low	[0.000512,0.0621)	136	116	nrmse	49.4
real_main	00.gencode-hisat2-stringtie-ballgown	1	1	Middle	[0.0621,0.353)	106	86	spearman	0.895455
real_main	00.gencode-hisat2-stringtie-ballgown	1	1	Middle	[0.0621,0.353)	106	86	nrmse	78.5
real_main	00.gencode-star-rsem-ebseq	1	1	Middle	[0.0621,0.353)	106	106	spearman	0.951533
real_main	00.gencode-star-rsem-ebseq	1	1	Middle	[0.0621,0.353)	106	106	nrmse	26.1
real_main	00.gencode-tophat2-cuffdiff	1	1	Middle	[0.0621,0.353)	106	105	spearman	0.933254
real_main	00.gencode-tophat2-cuffdiff	1	1	Middle	[0.0621,0.353)	106	105	nrmse	36.5
real_main	00.gencode-hisat2-stringtie-ballgown	1	1	High	[0.353,38.801]	95	92	spearman	0.909657
real_main	00.gencode-hisat2-stringtie-ballgown	1	1	High	[0.353,38.801]	95	92	nrmse	97.5
real_main	00.gencode-star-rsem-ebseq	1	1	High	[0.353,38.801]	95	95	spearman	0.939306
real_main	00.gencode-star-rsem-ebseq	1	1	High	[0.353,38.801]	95	95	nrmse	28.9
real_main	00.gencode-tophat2-cuffdiff	1	1	High	[0.353,38.801]	95	95	spearman	0.937752
real_main	00.gencode-tophat2-cuffdiff	1	1	High	[0.353,38.801]	95	95	nrmse	35.3

## Sheet: 06_real_n_de_map_all_tx
dataset	comparision	name	bin	interval	n_features	n_tested	n_de
real_main	maqca_maqca	00.gencode-hisat2-stringtie-ballgown	Low	[1.87e-05,0.255)	75627	14305	0
real_main	maqca_maqca	00.gencode-hisat2-stringtie-ballgown	Middle	[0.255,0.508)	75627	11786	1
real_main	maqca_maqca	00.gencode-hisat2-stringtie-ballgown	High	[0.508,1]	75628	6700	0
real_main	maqca_maqca	01.gencode-hisat2-stringtie-ballgown	Low	[1.87e-05,0.255)	75627	14484	0
real_main	maqca_maqca	01.gencode-hisat2-stringtie-ballgown	Middle	[0.255,0.508)	75627	11948	0
real_main	maqca_maqca	01.gencode-hisat2-stringtie-ballgown	High	[0.508,1]	75628	6746	0
real_main	maqca_maqca	02.gencode-hisat2-stringtie-ballgown	Low	[1.87e-05,0.255)	75627	14509	0
real_main	maqca_maqca	02.gencode-hisat2-stringtie-ballgown	Middle	[0.255,0.508)	75627	11982	0
real_main	maqca_maqca	02.gencode-hisat2-stringtie-ballgown	High	[0.508,1]	75628	6779	0
real_main	maqca_maqca	00.gencode-kallisto-sleuth_wt	Low	[1.87e-05,0.255)	75627	23932	1
real_main	maqca_maqca	00.gencode-kallisto-sleuth_wt	Middle	[0.255,0.508)	75627	32928	0
real_main	maqca_maqca	00.gencode-kallisto-sleuth_wt	High	[0.508,1]	75628	32983	0
real_main	maqca_maqca	01.gencode-kallisto-sleuth_wt	Low	[1.87e-05,0.255)	75627	23535	0
real_main	maqca_maqca	01.gencode-kallisto-sleuth_wt	Middle	[0.255,0.508)	75627	32567	0
real_main	maqca_maqca	01.gencode-kallisto-sleuth_wt	High	[0.508,1]	75628	32742	0
real_main	maqca_maqca	02.gencode-kallisto-sleuth_wt	Low	[1.87e-05,0.255)	75627	23356	0
real_main	maqca_maqca	02.gencode-kallisto-sleuth_wt	Middle	[0.255,0.508)	75627	32435	0
real_main	maqca_maqca	02.gencode-kallisto-sleuth_wt	High	[0.508,1]	75628	32482	0
real_main	maqca_maqca	00.gencode-star-rsem-ebseq	Low	[1.87e-05,0.255)	75627	61572	1118
real_main	maqca_maqca	00.gencode-star-rsem-ebseq	Middle	[0.255,0.508)	75627	66967	517
real_main	maqca_maqca	00.gencode-star-rsem-ebseq	High	[0.508,1]	75628	62303	42
real_main	maqca_maqca	01.gencode-star-rsem-ebseq	Low	[1.87e-05,0.255)	75627	61439	951
real_main	maqca_maqca	01.gencode-star-rsem-ebseq	Middle	[0.255,0.508)	75627	66840	436
real_main	maqca_maqca	01.gencode-star-rsem-ebseq	High	[0.508,1]	75628	62096	41
real_main	maqca_maqca	02.gencode-star-rsem-ebseq	Low	[1.87e-05,0.255)	75627	61455	796
real_main	maqca_maqca	02.gencode-star-rsem-ebseq	Middle	[0.255,0.508)	75627	66803	332
real_main	maqca_maqca	02.gencode-star-rsem-ebseq	High	[0.508,1]	75628	62095	18
real_main	maqca_maqca	00.gencode-tophat2-cuffdiff	Low	[1.87e-05,0.255)	75627	22766	0
real_main	maqca_maqca	00.gencode-tophat2-cuffdiff	Middle	[0.255,0.508)	75627	26960	0
real_main	maqca_maqca	00.gencode-tophat2-cuffdiff	High	[0.508,1]	75628	23696	0
real_main	maqca_maqca	01.gencode-tophat2-cuffdiff	Low	[1.87e-05,0.255)	75627	22804	0
real_main	maqca_maqca	01.gencode-tophat2-cuffdiff	Middle	[0.255,0.508)	75627	26898	0
real_main	maqca_maqca	01.gencode-tophat2-cuffdiff	High	[0.508,1]	75628	23594	0
real_main	maqca_maqca	02.gencode-tophat2-cuffdiff	Low	[1.87e-05,0.255)	75627	22620	0
real_main	maqca_maqca	02.gencode-tophat2-cuffdiff	Middle	[0.255,0.508)	75627	26551	0
real_main	maqca_maqca	02.gencode-tophat2-cuffdiff	High	[0.508,1]	75628	23277	0
real_main	maqca_maqcb	00.gencode-hisat2-stringtie-ballgown	Low	[1.87e-05,0.255)	75627	14305	5433
real_main	maqca_maqcb	00.gencode-hisat2-stringtie-ballgown	Middle	[0.255,0.508)	75627	11786	5511
real_main	maqca_maqcb	00.gencode-hisat2-stringtie-ballgown	High	[0.508,1]	75628	6700	4259
real_main	maqca_maqcb	01.gencode-hisat2-stringtie-ballgown	Low	[1.87e-05,0.255)	75627	14484	5041
real_main	maqca_maqcb	01.gencode-hisat2-stringtie-ballgown	Middle	[0.255,0.508)	75627	11948	5260
real_main	maqca_maqcb	01.gencode-hisat2-stringtie-ballgown	High	[0.508,1]	75628	6746	4175
real_main	maqca_maqcb	02.gencode-hisat2-stringtie-ballgown	Low	[1.87e-05,0.255)	75627	14509	5410
real_main	maqca_maqcb	02.gencode-hisat2-stringtie-ballgown	Middle	[0.255,0.508)	75627	11982	5552
real_main	maqca_maqcb	02.gencode-hisat2-stringtie-ballgown	High	[0.508,1]	75628	6779	4232
real_main	maqca_maqcb	00.gencode-kallisto-sleuth_wt	Low	[1.87e-05,0.255)	75627	23932	10698
real_main	maqca_maqcb	00.gencode-kallisto-sleuth_wt	Middle	[0.255,0.508)	75627	32928	12726
real_main	maqca_maqcb	00.gencode-kallisto-sleuth_wt	High	[0.508,1]	75628	32983	9750
real_main	maqca_maqcb	01.gencode-kallisto-sleuth_wt	Low	[1.87e-05,0.255)	75627	23535	10545
real_main	maqca_maqcb	01.gencode-kallisto-sleuth_wt	Middle	[0.255,0.508)	75627	32567	12667
real_main	maqca_maqcb	01.gencode-kallisto-sleuth_wt	High	[0.508,1]	75628	32742	9723
real_main	maqca_maqcb	02.gencode-kallisto-sleuth_wt	Low	[1.87e-05,0.255)	75627	23356	10578
real_main	maqca_maqcb	02.gencode-kallisto-sleuth_wt	Middle	[0.255,0.508)	75627	32435	12634
real_main	maqca_maqcb	02.gencode-kallisto-sleuth_wt	High	[0.508,1]	75628	32482	9650
real_main	maqca_maqcb	00.gencode-star-rsem-ebseq	Low	[1.87e-05,0.255)	75627	61572	21342
real_main	maqca_maqcb	00.gencode-star-rsem-ebseq	Middle	[0.255,0.508)	75627	66967	22531
real_main	maqca_maqcb	00.gencode-star-rsem-ebseq	High	[0.508,1]	75628	62303	19506
real_main	maqca_maqcb	01.gencode-star-rsem-ebseq	Low	[1.87e-05,0.255)	75627	61439	21494
real_main	maqca_maqcb	01.gencode-star-rsem-ebseq	Middle	[0.255,0.508)	75627	66840	22535
real_main	maqca_maqcb	01.gencode-star-rsem-ebseq	High	[0.508,1]	75628	62096	19640
real_main	maqca_maqcb	02.gencode-star-rsem-ebseq	Low	[1.87e-05,0.255)	75627	61455	21360
real_main	maqca_maqcb	02.gencode-star-rsem-ebseq	Middle	[0.255,0.508)	75627	66803	22424
real_main	maqca_maqcb	02.gencode-star-rsem-ebseq	High	[0.508,1]	75628	62095	19586
real_main	maqca_maqcb	00.gencode-tophat2-cuffdiff	Low	[1.87e-05,0.255)	75627	22766	10053
real_main	maqca_maqcb	00.gencode-tophat2-cuffdiff	Middle	[0.255,0.508)	75627	26960	11321
real_main	maqca_maqcb	00.gencode-tophat2-cuffdiff	High	[0.508,1]	75628	23696	9247
real_main	maqca_maqcb	01.gencode-tophat2-cuffdiff	Low	[1.87e-05,0.255)	75627	22804	9816
real_main	maqca_maqcb	01.gencode-tophat2-cuffdiff	Middle	[0.255,0.508)	75627	26898	10969
real_main	maqca_maqcb	01.gencode-tophat2-cuffdiff	High	[0.508,1]	75628	23594	9033
real_main	maqca_maqcb	02.gencode-tophat2-cuffdiff	Low	[1.87e-05,0.255)	75627	22620	9773
real_main	maqca_maqcb	02.gencode-tophat2-cuffdiff	Middle	[0.255,0.508)	75627	26551	10918
real_main	maqca_maqcb	02.gencode-tophat2-cuffdiff	High	[0.508,1]	75628	23277	8907
real_main	maqcb_maqcb	00.gencode-hisat2-stringtie-ballgown	Low	[1.87e-05,0.255)	75627	14305	0
real_main	maqcb_maqcb	00.gencode-hisat2-stringtie-ballgown	Middle	[0.255,0.508)	75627	11786	1
real_main	maqcb_maqcb	00.gencode-hisat2-stringtie-ballgown	High	[0.508,1]	75628	6700	0
real_main	maqcb_maqcb	01.gencode-hisat2-stringtie-ballgown	Low	[1.87e-05,0.255)	75627	14484	0
real_main	maqcb_maqcb	01.gencode-hisat2-stringtie-ballgown	Middle	[0.255,0.508)	75627	11948	0
real_main	maqcb_maqcb	01.gencode-hisat2-stringtie-ballgown	High	[0.508,1]	75628	6746	0
real_main	maqcb_maqcb	02.gencode-hisat2-stringtie-ballgown	Low	[1.87e-05,0.255)	75627	14509	0
real_main	maqcb_maqcb	02.gencode-hisat2-stringtie-ballgown	Middle	[0.255,0.508)	75627	11982	0
real_main	maqcb_maqcb	02.gencode-hisat2-stringtie-ballgown	High	[0.508,1]	75628	6779	0
real_main	maqcb_maqcb	00.gencode-kallisto-sleuth_wt	Low	[1.87e-05,0.255)	75627	23932	1
real_main	maqcb_maqcb	00.gencode-kallisto-sleuth_wt	Middle	[0.255,0.508)	75627	32928	0
real_main	maqcb_maqcb	00.gencode-kallisto-sleuth_wt	High	[0.508,1]	75628	32983	0
real_main	maqcb_maqcb	01.gencode-kallisto-sleuth_wt	Low	[1.87e-05,0.255)	75627	23535	0
real_main	maqcb_maqcb	01.gencode-kallisto-sleuth_wt	Middle	[0.255,0.508)	75627	32567	0
real_main	maqcb_maqcb	01.gencode-kallisto-sleuth_wt	High	[0.508,1]	75628	32742	0
real_main	maqcb_maqcb	02.gencode-kallisto-sleuth_wt	Low	[1.87e-05,0.255)	75627	23356	0
real_main	maqcb_maqcb	02.gencode-kallisto-sleuth_wt	Middle	[0.255,0.508)	75627	32435	0
real_main	maqcb_maqcb	02.gencode-kallisto-sleuth_wt	High	[0.508,1]	75628	32482	0
real_main	maqcb_maqcb	00.gencode-star-rsem-ebseq	Low	[1.87e-05,0.255)	75627	61572	1118
real_main	maqcb_maqcb	00.gencode-star-rsem-ebseq	Middle	[0.255,0.508)	75627	66967	517
real_main	maqcb_maqcb	00.gencode-star-rsem-ebseq	High	[0.508,1]	75628	62303	42
real_main	maqcb_maqcb	01.gencode-star-rsem-ebseq	Low	[1.87e-05,0.255)	75627	61439	951
real_main	maqcb_maqcb	01.gencode-star-rsem-ebseq	Middle	[0.255,0.508)	75627	66840	436
real_main	maqcb_maqcb	01.gencode-star-rsem-ebseq	High	[0.508,1]	75628	62096	41
real_main	maqcb_maqcb	02.gencode-star-rsem-ebseq	Low	[1.87e-05,0.255)	75627	61455	796
real_main	maqcb_maqcb	02.gencode-star-rsem-ebseq	Middle	[0.255,0.508)	75627	66803	332
real_main	maqcb_maqcb	02.gencode-star-rsem-ebseq	High	[0.508,1]	75628	62095	18
real_main	maqcb_maqcb	00.gencode-tophat2-cuffdiff	Low	[1.87e-05,0.255)	75627	22766	0
real_main	maqcb_maqcb	00.gencode-tophat2-cuffdiff	Middle	[0.255,0.508)	75627	26960	0
real_main	maqcb_maqcb	00.gencode-tophat2-cuffdiff	High	[0.508,1]	75628	23696	0
real_main	maqcb_maqcb	01.gencode-tophat2-cuffdiff	Low	[1.87e-05,0.255)	75627	22804	0
real_main	maqcb_maqcb	01.gencode-tophat2-cuffdiff	Middle	[0.255,0.508)	75627	26898	0
real_main	maqcb_maqcb	01.gencode-tophat2-cuffdiff	High	[0.508,1]	75628	23594	0
real_main	maqcb_maqcb	02.gencode-tophat2-cuffdiff	Low	[1.87e-05,0.255)	75627	22620	0
real_main	maqcb_maqcb	02.gencode-tophat2-cuffdiff	Middle	[0.255,0.508)	75627	26551	0
real_main	maqcb_maqcb	02.gencode-tophat2-cuffdiff	High	[0.508,1]	75628	23277	0

## Sheet: 07_sim_all_de
dataset	name	n_features	n_tested	metric	value
sim_main	0.gencode-tophat2-cuffdiff	59022	52796	spearman	0.808206
sim_main	0.gencode-tophat2-cuffdiff	59022	52796	nrmse	81.8
sim_main	0.gencode-tophat2-cuffdiff	59022	52796	auc	0.81124
sim_main	0.gencode-star-rsem-ebseq	59022	58847	spearman	0.825023
sim_main	0.gencode-star-rsem-ebseq	59022	58847	nrmse	55
sim_main	0.gencode-star-rsem-ebseq	59022	58847	auc	0.82416
sim_main	0.gencode-hisat2-stringtie-ballgown	59022	24974	spearman	0.410383
sim_main	0.gencode-hisat2-stringtie-ballgown	59022	24974	nrmse	110.2
sim_main	0.gencode-hisat2-stringtie-ballgown	59022	24974	auc	0.631357
sim_main	0.gencode-kallisto-sleuth_wt	59022	55314	spearman	0.78151
sim_main	0.gencode-kallisto-sleuth_wt	59022	55314	nrmse	68.7
sim_main	0.gencode-kallisto-sleuth_wt	59022	55314	auc	0.773472

## Sheet: 08_sim_all_quant
dataset	name	n_features	metric	value
sim_main	0.gencode-tophat2-cuffdiff	59022	spearman	0.924844
sim_main	0.gencode-tophat2-cuffdiff	59022	nrmse	7.2
sim_main	0.gencode-hisat2-stringtie	59022	spearman	0.862597
sim_main	0.gencode-hisat2-stringtie	59022	nrmse	10.3
sim_main	0.gencode-star-rsem	59022	spearman	0.926801
sim_main	0.gencode-star-rsem	59022	nrmse	6.6
sim_main	0.gencode-kallisto	59022	spearman	0.941955
sim_main	0.gencode-kallisto	59022	nrmse	23.6

## Sheet: 09_sim_all_de_tailored
dataset	name	n_features	n_tested	metric	value																								dataset	name	n_features	n_tested	metric	value
sim_add	0.gencode-tophat2-cuffdiff	59022	53343	spearman	0.813069																								sim_add	0.gencode-tophat2-cuffdiff	59022	53343	spearman	0.813069
sim_add	0.gencode-tophat2-cuffdiff	59022	53343	nrmse	80.4																								sim_add	0.gencode-tophat2-cuffdiff	59022	53343	nrmse	80.4
sim_add	0.gencode-tophat2-cuffdiff	59022	53343	auc	0.81464																								sim_add	0.gencode-tophat2-cuffdiff	59022	53343	auc	0.81464
sim_add	0.gencode-hisat2-stringtie-ballgown	59022	25337	spearman	0.469163																								sim_add	0.gencode-hisat2-stringtie-ballgown	59022	25337	spearman	0.469163
sim_add	0.gencode-hisat2-stringtie-ballgown	59022	25337	nrmse	111.9																								sim_add	0.gencode-hisat2-stringtie-ballgown	59022	25337	nrmse	111.9
sim_add	0.gencode-hisat2-stringtie-ballgown	59022	25337	auc	0.642732																								sim_add	0.gencode-hisat2-stringtie-ballgown	59022	25337	auc	0.642732
sim_add	0.gencode-kallisto-sleuth_wt	59022	55736	spearman	0.785509																								sim_add	0.gencode-kallisto-sleuth_wt	59022	55736	spearman	0.785509
sim_add	0.gencode-kallisto-sleuth_wt	59022	55736	nrmse	68.9																								sim_add	0.gencode-kallisto-sleuth_wt	59022	55736	nrmse	68.9
sim_add	0.gencode-kallisto-sleuth_wt	59022	55736	auc	0.774721																								sim_add	0.gencode-kallisto-sleuth_wt	59022	55736	auc	0.774721
																													sim_add	0.gencode-star-rsem	59022	n.d.	spearman	NA
																													sim_add	0.gencode-star-rsem	59022	n.d.	nrmse	NA
																													sim_add	0.gencode-star-rsem	59022	n.d.	auc	NA

[truncated: 1 more sheets: 10_sim_all_quant_tailored]
